# Supplementary material
Source: PubMed Central journal article supplement (PMC535427)

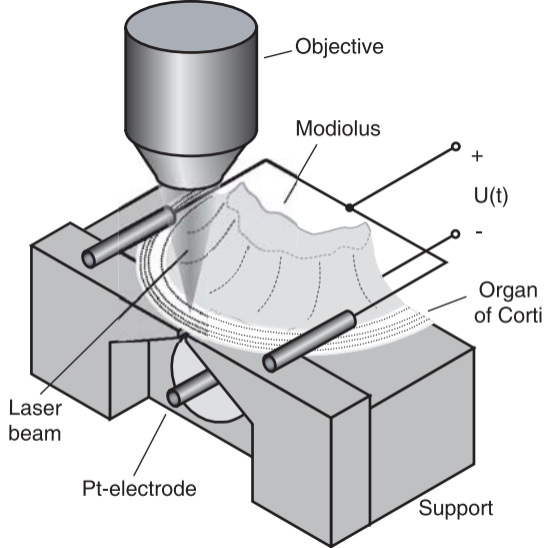

Supplement: pnas_101_51_17652__1.pdf [file pnas_101_51_17652__1.pdf]

## Displacement

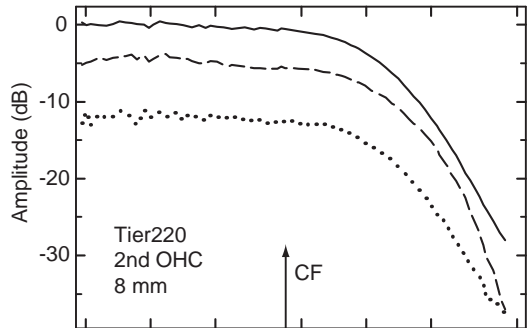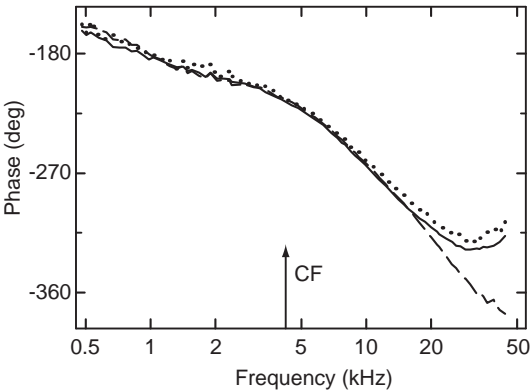

Supplement: pnas_101_51_17652__3.pdf [file pnas_101_51_17652__3.pdf]
